# Supplementary material for: Downward National Trends in Mental Health Treatment Offered in Spanish: State Differences by Proportion of Hispanic Residents
Source: Atypon-hosted journal article supplement (doi:10.1176/appi.ps.202100614), 2022-05-03
Supplement: appi.ps.202100614.ds001.pdf [file appi.ps.202100614.ds001.pdf]

Supplemental Table 1: Characteristics of the ten states with the highest proportion of Hispanic residents and the ten states with the fastest growth in Hispanic residents between 2014 and 2019

| State | Percentage of state Hispanic population |      |          | Percentage of state mental health facilities offering Spanish language |      |          |
|-------|-----------------------------------------|------|----------|------------------------------------------------------------------------|------|----------|
|       | 2014                                    | 2019 | % change | 2014                                                                   | 2019 | % change |

*10 states with the highest Hispanic population density in 2019*

|            |      |      |     |      |      |       |
|------------|------|------|-----|------|------|-------|
| New Mexico | 47.0 | 48.8 | 3.8 | 61.7 | 62.3 | -0.8  |
| Texas      | 38.2 | 39.3 | 2.8 | 64.7 | 62.2 | -3.8  |
| California | 38.2 | 39.0 | 2.1 | 77.7 | 74.2 | -4.4  |
| Arizona    | 30.1 | 31.3 | 3.9 | 64.2 | 61.2 | -4.5  |
| Nevada     | 27.2 | 28.7 | 5.5 | 54.3 | 50.1 | -5.1  |
| Florida    | 23.3 | 25.6 | 9.8 | 63.3 | 56.5 | -10.7 |
| Colorado   | 20.9 | 21.5 | 2.8 | 58.4 | 35.7 | -38.7 |
| New Jersey | 18.6 | 20.2 | 8.6 | 54.5 | 47.9 | -12.1 |
| New York   | 18.2 | 19.0 | 4.4 | 50.1 | 48.1 | -4.1  |
| Illinois   | 16.3 | 17.1 | 4.9 | 33.3 | 28.4 | -14.1 |

*10 states with the fastest growth in Hispanic population density between 2014-2019*

|               |      |      |      |      |      |       |
|---------------|------|------|------|------|------|-------|
| North Dakota  | 2.6  | 3.7  | 42.3 | 34.5 | 3.0  | -91.1 |
| West Virginia | 1.3  | 1.6  | 23.0 | 8.5  | 5.9  | -30.0 |
| Maine         | 1.7  | 4.6  | 21.4 | 7.2  | 1.6  | -76.9 |
| Pennsylvania  | 6.1  | 7.3  | 19.6 | 28.9 | 25.4 | -12.1 |
| New Hampshire | 3.1  | 3.7  | 19.3 | 26.1 | 18.5 | -28.9 |
| South Dakota  | 3.2  | 3.8  | 18.8 | 25.5 | 22.4 | -11.8 |
| Montana       | 3.2  | 3.8  | 18.8 | 5.5  | 5.8  | -5.8  |
| Vermont       | 1.6  | 1.9  | 18.7 | 8.2  | 7.3  | -10.7 |
| Rhode Island  | 13.3 | 15.4 | 15.7 | 44.1 | 41.2 | -6.4  |
| Massachusetts | 10.2 | 11.8 | 15.6 | 49.4 | 48.4 | -1.9  |

Supplemental Table 2: The number of mental health facilities that offer Spanish services per 100,000 Hispanic state residents

| State | Ratio | State | Ratio |
|-------|-------|-------|-------|
| VT    | 47.2  | MD    | 12.0  |
| SD    | 35.0  | MN    | 11.7  |
| WV    | 28.2  | AZ    | 11.4  |
| NH    | 25.2  | NY    | 11.3  |
| WY    | 24.5  | MI    | 11.1  |
| ID    | 23.9  | KS    | 9.7   |
| AK    | 22.5  | MO    | 9.5   |
| OH    | 21.4  | HI    | 9.4   |
| CT    | 20.7  | VA    | 8.5   |
| UT    | 20.0  | NJ    | 8.2   |
| MS    | 19.8  | TN    | 8.2   |
| MA    | 19.4  | OK    | 7.8   |
| NE    | 18.9  | LA    | 7.2   |
| WI    | 18.2  | NC    | 6.4   |
| DE    | 16.5  | CO    | 5.6   |
| PA    | 15.5  | FL    | 5.3   |
| RI    | 15.4  | SC    | 5.3   |
| IA    | 14.6  | GA    | 5.2   |
| IN    | 14.2  | IL    | 5.2   |
| AR    | 14.1  | CA    | 4.6   |
| ME    | 13.7  | KY    | 4.4   |
| MT    | 13.1  | NM    | 4.3   |
| OR    | 13.0  | NV    | 3.8   |
| WA    | 12.9  | ND    | 3.4   |
| AL    | 12.8  | TX    | 2.1   |
